# Supplementary material
Source: PubMed Central journal article supplement (PMC10637453)

## Supplemental Material

|                                                                                                                                                                             |         |
|-----------------------------------------------------------------------------------------------------------------------------------------------------------------------------|---------|
| Supplemental Methods 1                                                                                                                                                      | Page 3  |
| Supplemental Methods 2                                                                                                                                                      | Page 3  |
| Supplemental Table 1: Description of the 30 <i>CFH</i> rare variants identified in 38 patients with C3 glomerulopathy or Ig-MPGN                                            | Page 5  |
| Supplemental Table 2: Description of the 13 <i>CFI</i> rare variants identified in 17 patients with C3 glomerulopathy or Ig-MPGN                                            | Page 7  |
| Supplemental Table 3: Description of the 10 <i>C3</i> rare variants identified in 13 patients with C3 glomerulopathy or Ig-MPGN                                             | Page 9  |
| Supplemental Table 4: Exhaustive genetic, immunological and histological characteristics of the 66 C3 glomerulopathy/Ig-MPGN patients carrying complement rare variants     | Page 10 |
| Supplemental Table 5: Characteristics of inherited C3 glomerulopathy/Ig-MPGN according to age diagnosis*                                                                    | Page 12 |
| Supplemental Table 6: Characteristics of C3 glomerulopathy/Ig-MPGN children patients carrying rare variants in <i>CFH</i> , <i>CFI</i> , <i>C3</i> genes or not.            | Page 13 |
| Supplemental Table 7: Characteristics of C3 glomerulopathy/Ig-MPGN adults under 50 patients carrying rare variants in <i>CFH</i> , <i>CFI</i> , <i>C3</i> genes or not      | Page 14 |
| Supplemental Table 8: Characteristics of C3 glomerulopathy/Ig-MPGN adults older than 50 patients carrying rare variants in <i>CFH</i> , <i>CFI</i> , <i>C3</i> genes or not | Page 15 |
| Supplemental Table 9: Detailed histological characteristics in inherited C3 glomerulopathy/Ig-MPGN                                                                          | Page 16 |
| Supplemental Table 10: Characteristics of patients with inherited C3 glomerulopathy/Ig-MPGN according to histological diagnosis                                             | Page 17 |
| Supplemental Table 11: Detailed immunological characteristics of inherited C3 glomerulopathy/Ig-MPGN                                                                        | Page 19 |
| Supplemental Table 12: Cumulative frequency of the rare and pathogenic variants between C3 glomerulopathy/Ig-MPGN cohorts and 503 controls from the 1000 genome project     | Page 20 |
| Supplemental Table 13: Kidney transplant outcomes in patients with inherited C3 glomerulopathy/Ig-MPGN                                                                      | Page 21 |

|                                                                                                                                                                                                          |         |
|----------------------------------------------------------------------------------------------------------------------------------------------------------------------------------------------------------|---------|
| Supplemental Figure 1: C3b molecular structure with the position of rare variants of C3 identified in patients with C3 glomerulopathy/Ig-MPGN.                                                           | Page 22 |
| Supplemental Figure 2: C3 glomerulopathy, Ig-MPGN and <i>CFH</i> , <i>CFI</i> , <i>C3</i> rare variants: patients repartition in national French registry according to age at diagnosis.                 | Page 23 |
| Supplemental Figure 3: Kidney survival of children and adults with inherited C3 glomerulopathy/Ig-MPGN.                                                                                                  | Page 24 |
| Supplemental Figure 4: Kidney survival of patients with inherited C3 glomerulopathy/Ig-MPGN compared to kidney survival of patients without complement rare variant receiving or not specific treatment. | Page 25 |

## **Supplemental Methods**

### **Supplemental Methods 1**

Kidney parameters (i.e proteinuria, estimated glomerular filtration rate (eGFR), nephrotic syndrome, hematuria) were assessed at first clinical evaluation and at last follow up and were retrospectively collected. Nephrotic range proteinuria and nephrotic syndrome were defined using KDIGO criteria(1). The staging of chronic kidney disease was based on the international KDIGO(2) definition. Biological stigmata of thrombotic microangiopathy (TMA) was defined by the association of mechanical hemolytic anemia (hemoglobin <10 g/dl, lactate dehydrogenase level >upper limit of normal, undetectable haptoglobin, and the presence of schistocytes on a blood smear), with thrombocytopenia (platelet count <150 G/L).

### **Supplemental Methods 2**

For complement assessment, blood was drawn into tubes with the anticoagulant ethylenediaminetetraacetic acid. Plasma protein concentrations of C3, C4 were measured by nephelometry (Dade Behring, Deerfield, IL, USA). Soluble C5b-9 level was determined using the MicroVue sC5b-9 Plus EIA Assay (Quidel, San Diego, CA), according to manufacturer instructions. The ELISA method was used to detect anti-Factor H antibodies as previously described(3). C3NeF activity was determined by assessing the ability of purified plasma IgG to stabilize the membrane-bound C3bBb convertase in an hemolytic assay as previously described(4).

The crystal structure of C3b was obtained from the Protein Data Bank. Molecular graphic imaging of C3b with amino-acid changes were produced using a Pymol (<http://www.pymol.org/>) and UCSF Chimera package ([http:// www.cgl.ucsf.edu/chimera](http://www.cgl.ucsf.edu/chimera)). For this study, the numbering was made according to the mature protein sequence (without the 22-amino acid long leader peptide).

## **References**

1. Floege J, Barbour SJ, Cattran DC, Hogan JJ, Nachman PH, Tang SCW, Wetzels JFM, Cheung M, Wheeler DC, Winkelmayr WC, Rovin BH, Adler SG, Alpers CE, Ayoub I, Bagga A, Barratt J, Caster DJ, Chan DTM, Chang A, Choo JCJ, Cook HT, Coppo R, Fervenza FC, Fogo AB, Fox JG, Gibson KL, Glasscock RJ, Harris D, Hodson EM, Hoxha E, Iseki K, Jennette JC, Jha V, Johnson DW, Kaname S, Katafuchi R, Kitching AR, Lafayette RA, Li PKT, Liew A, Lv J, Malvar A, Maruyama S, Mejía-Vilet JM, Moeller MJ, Mok CC, Nester CM, Noiri E, O'Shaughnessy MM, Özen S, Parikh SM, Park H-C, Peh CA, Pendergraft WF, Pickering MC, Pillebout E, Radhakrishnan J, Rathi M, Rocatello D, Ronco P, Smoyer WE, Tesar V, Thurman JM, Trimarchi H, Vivarelli M, Walters GD, Wang AY-M,

Wenderfer SE: Management and treatment of glomerular diseases (part 1): conclusions from a Kidney Disease: Improving Global Outcomes (KDIGO) Controversies Conference. *Kidney Int* 95: 268–280, 2019

2. Levey AS, de Jong PE, Coresh J, Nahas ME I., Astor BC, Matsushita K, Gansevoort RT, Kasiske BL, Eckardt K-U: The definition, classification, and prognosis of chronic kidney disease: a KDIGO Controversies Conference report. *Kidney Int* 80: 17–28, 2011

3. Sénant M, Dragon-Durey M-A: Anti-factor H Autoantibodies Assay by ELISA [Internet]. In: *Autoantibodies*, edited by Houen G, pp 191–196, 2019 Available from: [http://link.springer.com/10.1007/978-1-4939-8949-2\\_15](http://link.springer.com/10.1007/978-1-4939-8949-2_15) [cited 2020 Aug 26]

4. Marinozzi M-C, Chauvet S, Le Quintrec M, Mignotet M, Petitprez F, Legendre C, Cailliez M, Deschenes G, Fischbach M, Karras A, Nobili F, Pietrement C, Dragon-Durey M-A, Fakhouri F, Roumenina LT, Fremeaux-Bacchi V: C5 nephritic factors drive the biological phenotype of C3 glomerulopathies. *Kidney Int* 92: 1232–1241, 2017

5. 1000 Genomes Project Consortium, Auton A, Brooks LD, Durbin RM, Garrison EP, Kang HM, Korbel JO, Marchini JL, McCarthy S, McVean GA, Abecasis GR: A global reference for human genetic variation. *Nature* 526: 68–74, 2015

## Supplemental Tables

**Supplemental Table 1:** Description of the 30 *CFH* rare variants identified in 38 patients with C3 glomerulopathy or Ig-MPGN

| Nbr of cases         | Variant                             | Transcript          | Status | CCP Domain | Allele frequency (%) | CADD score | In vitro functional characterization <sup>a</sup>                                  | FH quantification             | Classification (This report) |            |
|----------------------|-------------------------------------|---------------------|--------|------------|----------------------|------------|------------------------------------------------------------------------------------|-------------------------------|------------------------------|------------|
| 2 (Fam)              | p.Arg53Cys <sup>o</sup>             | c.157C>T            | Ho/He  | 1          | 0.004                | 24.6       | Impaired decay accelerating activity and FI cofactor activity                      | Normal                        | Pathogenic                   |            |
| 1                    | p.Val72Glyfs*3                      | c.215_216del        | He     | 1          | novel                |            | no                                                                                 | Normal <sup>d</sup>           | Pathogenic                   |            |
| 1                    | p.Leu77Stop <sup>o</sup>            | c.230delT           | He     | 1          | novel                |            | no                                                                                 | Low FH plasma level           | Pathogenic                   |            |
| 2 (Fam)              | p.Gly94Arg                          | c.280G>C            | He     | 2          | novel                | 24,6       | no                                                                                 | Low FH plasma level           | Pathogenic                   |            |
| 1                    | p.Gly122_Glu128del fs <sup>*o</sup> | c.364_383del (21nt) | He     | 2          | novel                |            | no                                                                                 | Normal <sup>d</sup>           | Pathogenic                   |            |
| 2                    | p.Asp130Asn <sup>o</sup>            | c.388G>A            | He     | 2          | 0.03                 | 22.6       | Minor defects in complement regulation (debatable functional deficiency)           | Normal                        | VUS                          |            |
| 1                    | p.Cys141Arg                         | c.421T>C            | He     | 2          | novel                | 27.1       | no                                                                                 | Loss of a conserved cysteine; | Low FH plasma level          | Pathogenic |
| 1                    | p.Val143Ile <sup>o</sup>            | c.427G>A            | He     | 2          | novel                | 25         | no                                                                                 | Low FH plasma level           | Pathogenic                   |            |
| 3                    | p.Ala161Ser <sup>o</sup>            | c.481G>T            | He     | 3          | 0.006                | 12.1       | No/small perturbed the regulatory activity of FH (debatable functional deficiency) | Normal                        | VUS                          |            |
| 1                    | p.Arg232Stop <sup>o</sup>           | c.694C>T            | He     | 4          | 0.0009               | 34         | no                                                                                 | Low FH plasma level           | Pathogenic                   |            |
| 1                    | p.Arg303Trp                         | c.907C>T            | He     | 5          | 0.008                | 18.5       | no                                                                                 | Normal                        | VUS                          |            |
| 1                    | p.Cys431Arg                         | c.1291T>C           | He     | 7          | novel                | 23,8       | no                                                                                 | Loss of a conserved cysteine  | Low FH plasma level          | Pathogenic |
| 3 (Fam) <sup>b</sup> | p.Cys431Ser <sup>o</sup>            | c.1291T>A           | Ho     | 7          | 0.0004               | 23.8       | no                                                                                 | Loss of a conserved cysteine; | Low FH plasma level          | Pathogenic |
| 1                    | p.Trp436Stop                        | c.1307G>A           | He     | 7          | novel                | 37         | no                                                                                 | Low FH plasma level           | Pathogenic                   |            |
| 1                    | p.Arg444Cys                         | c.1330C>T           | He     | 7          | 0.002                | 22.9       | no                                                                                 | Normal                        | VUS                          |            |

|         |                           |               |     |             |        |      |                      |                               |                                  |            |
|---------|---------------------------|---------------|-----|-------------|--------|------|----------------------|-------------------------------|----------------------------------|------------|
| 1       | p.Gly498Stop              | c.1492G>T     | He  | 8           | novel  | 37   | no                   |                               | Low FH plasma level              | Pathogenic |
| 1       | p.Cys536Arg               | c.1606T>C     | Het | 9           | novel  | 24.3 | no                   | Loss of a conserved cysteine; | Low FH plasma level              | Pathogenic |
| 1       | p.Cys597Arg <sup>°</sup>  | c.1789T>C     | Ho  | 10          | novel  | 25.1 | no                   | Loss of a conserved cysteine; | Low FH plasma level              | Pathogenic |
| 1       | p.Cys673Ser <sup>°</sup>  | c.2018G>C     | Ho  | 11          | novel  | 26   | no                   | Loss of a conserved cysteine; | Low FH plasma level              | Pathogenic |
| 1       | p.Cys673Arg               | c.2017T>C     | He  | 11          | novel  | 26   | no                   | Loss of a conserved cysteine; | Low FH plasma level              | Pathogenic |
| 1       | p.Val686Met               | c.2056 G>A    | He  | 11          | novel  | 34   | no                   |                               | Low FH plasma level <sup>c</sup> | Pathogenic |
| 2 (Fam) | p.Phe717Leu <sup>°</sup>  | c.2151C>A     | He  | 12          | 0.0009 | 13.7 | no                   |                               | Normal                           | VUS        |
| 1       | IVS 15+5                  | c.2413+5G>A   | He  | splice site | novel  | 18.8 | no                   |                               | Low FH plasma level              | Pathogenic |
| 1       | p.Tyr843Asp               | c.2527T>G     | He  | 14          | novel  | 22.7 | no                   |                               | Normal                           | VUS        |
| 1       | p.Gln872Stop              | c.2614 C>T    | He  | 15          | novel  | 41   | no                   |                               | Low FH plasma level              | Pathogenic |
| 1       | p.Gly879Arg               | c.2635G>A     | He  | 15          | 0.0009 | 25.6 | no                   |                               | Low FH plasma level              | Pathogenic |
| 1       | p.Gly962ValfsTer13        | c.2882delA    | He  | 16          | novel  |      | no                   |                               | Low FH plasma level              | Pathogenic |
| 1       | p.Cys1043Ser <sup>°</sup> | c.3138G>C     | He  | 17          | novel  | 26.2 | no                   | Loss of a conserved cysteine; | Low FH plasma level              | Pathogenic |
| 1       | p.Arg1210Cys <sup>°</sup> | c.3628C>T     | He  | 20          | 0.03   | 2.9  | Impaired C3b binding |                               | Normal                           | Pathogenic |
| 1       | p.ter 1232 IlefsTer38     | c3691-3694del | He  | 20          | novel  |      | no                   |                               | Low FH plasma level              | Pathogenic |

Note: Alle Frequency are given from GnomAD data base and according to ethnicity of patient

Abbreviations: Het: Heterozygous; Hom: homozygous; VUS: variants of undetermined significance, Fam, familial form, FH, factor H

<sup>a</sup>Functional studies reported by Wong et al and Merinero et al. ; <sup>b</sup>One of the three patient carried an homozygous pathogenic *CFH* variant (p.Cys431Ser) and a C3 VUS

(p.Ala257Thr) and was included in the group of patients with *CFH* variant ; <sup>c</sup> this variant was classified benign by Merinero et al but the patient carrying this variant in our study had very low FH plasma level <sup>d</sup> Prediction with strong evidence of pathogenicity but normal FH plasma level. <sup>°</sup> Cases already reported in Servais et al

**Supplemental Table 2:** Description of the 13 *CFI* rare variants identified in 17 patients with C3 glomerulopathy or Ig-MPGN

| Nbr of cases   | Variant <sup>a</sup>        | Transcript | Allele frequency (%) | CADD score | In vitro functional characterization <sup>b</sup>                              | FI quantification   | Classification (This report) |
|----------------|-----------------------------|------------|----------------------|------------|--------------------------------------------------------------------------------|---------------------|------------------------------|
|                |                             |            |                      |            | No/small reduced expression compared to wt (debatable quantitative deficiency) |                     | Pathogenic                   |
| 2 <sup>c</sup> | p.Pro50Ala*                 | c.148 C>G  | 0.01                 | 24.8       |                                                                                | Low FI plasma level |                              |
| 1              | p.Gly119Arg <sup>o</sup>    | c.355G>A   | 0.09                 | 21         | Significantly reduced expression compared to WT                                | Low FI plasma level | Pathogenic                   |
| 2              | p.Asn151Ser                 | c.452 A>G  | 0.002                | 25.5       | Significantly reduced expression compared to WT                                | Normal              | Pathogenic                   |
| 1 <sup>c</sup> | p.Ala210Ser                 | c.628G>T   | novel                | 24.4       | no                                                                             | Low FI plasma level | Pathogenic                   |
| 1              | p.Ala240Gly <sup>o</sup>    | c.719 C>G  | 0.009                | 23.9       | Significantly reduced expression compared to WT                                | Normal              | Pathogenic                   |
| 1              | p.Val282Leu                 | c.844G>C   | novel                | 7.6        | no                                                                             | Normal FI level     | VUS                          |
| 1 <sup>d</sup> | p.Ile306Val**               | c.916A>G   | 0.05                 | 10.18      | Comparable to Wt                                                               | Normal              | VUS                          |
| 1              | p.Cys327Arg <sup>o</sup>    | c.979T>C   | 0.0004               | 24.5       | Significantly reduced expression compared to WT                                | Low FI plasma level | Pathogenic                   |
| 3              | p.Ile357Met                 | c.1071 T>G | 0.005                | 23.5       | Significantly reduced expression compared to WT                                | Low FI plasma level | Pathogenic                   |
| 1              | p.Arg406Cys                 | c.1216 C>T | 0.002                | 13.8       | Significantly reduced expression compared to WT                                | Normal              | Pathogenic                   |
| 2              | p.Ile416Leu*** <sup>o</sup> | c.1246 A>C | 0.02                 | 18.7       | Significantly reduced expression compared to WT                                | Low FI plasma level | Pathogenic                   |
| 1              | p.Arg474Stop                | c.1420C>T  | 0.006                | 40         | Significantly reduced expression compared to WT                                | Low FI plasma level | Pathogenic                   |
| 1              | p.Ter584GlnextTer24         | c.1750T>C  | novel                |            | no                                                                             | Low FI plasma level | Pathogenic                   |

Note: Alle Frequency are given from GnomAD data base and according to ethnicity of patient

Abbreviation: VUS: variants of undetermined significance. FI, factor I

<sup>a</sup> All reported variant are heterozygous <sup>b</sup> Summary of the functional studies reported by de Jong et al; <sup>c</sup> The patient carried two rare variants in CFI (p.Pro50Ala and p.Ala210Ser); <sup>d</sup> The patient carried a pathogenic variant in C3 (p.Asn1179Thr) and a CFI VUS (p.Ile306Val) and was included in the group of patients with C3 variants . \* The variant p.Pro50Ala was classified as pathogenic despite conflicting results of functional studies. \*\* The allele frequency for p.Ile306Val in African population is 0.5%; \*\*\* The allele frequency for p.Ile416Leu in African population is 1.2%.

<sup>o</sup> Cases already reported in Servais et al



**Supplemental Table 3:** Description of the 10 C3 rare variants identified in 13 patients with C3-glomerulopathy or Ig-MPGN

| number of cases | variant <sup>a</sup> | Transcript | Domain    | Allele frequency, % (gnomAD) | CADD score | In vitro functional characterization <sup>b</sup> | Location on functional site of C3 molecule    | Variant Classification (this report) |
|-----------------|----------------------|------------|-----------|------------------------------|------------|---------------------------------------------------|-----------------------------------------------|--------------------------------------|
| 1               | p.Gln216Pro          | c.647A>C   | MG2       | novel                        | 16.08      | no                                                |                                               | VUS                                  |
| 1 <sup>c</sup>  | p.Ala257Thr          | c.769G>A   | MG3       | 0.009                        | 25.9       | no                                                |                                               | VUS                                  |
| 1               | p.Thr426Iys          | c.1277 C>A | MG4       | novel                        | 24.3       | no                                                |                                               | VUS                                  |
| 1               | p.Gly590Ala          | c.1769G>C  | MG6 beta  | 0.0008                       | 23.4       | no                                                |                                               | VUS                                  |
| 2               | p.Gly637Arg          | c.1909 G>C | LNK       | 0.03                         | 21.9       | no                                                |                                               | VUS                                  |
| 2 (fam)         | p. Ile756Thr         | c.2327T.C  | MG6 alpha | novel                        | 17.9       | Significant decrease in FH/CR1 binding            |                                               | Pathogenic                           |
| 1               | p.Phe794Cys          | c.2381T>G  | MG6 alpha | novel                        | 22.8       | no                                                |                                               | VUS                                  |
| 2 (fam)         | p.Pro1114Leu         | c.3341 C>T | TED       | novel                        | 25.2       | Significant decrease in FH binding                |                                               | Pathogenic                           |
| 1 <sup>d</sup>  | p.Asn1179Thr         | c.3536A>C  | TED       | novel                        | 14.99      | no                                                | Located in the C3d binding site on CCP4 of FH | Pathogenic                           |
| 1               | p.Gly1224Asp *       | c.3671G>A  | TED       | 0.016                        | 13.25      | no                                                |                                               | VUS                                  |

Note: Allele Frequency are given from GnomAD data base and according to ethnicity of patient

Abbreviation: fam, familial form, FH, factor H, VUS: variants of undetermined significance.

<sup>a</sup> All reported variant are heterozygous <sup>b</sup> Summary of the functional studies reported by Schramm et al and Chauvet et al; <sup>c</sup> The patient carried a C3 VUS (p.Ala257Thr) and an homozygous pathogenic *CFH* variant (p.Cys431Ser) and was included in the group of patients with *CFH* variant; <sup>d</sup>: The patient carried a pathogenic variant in C3 (p.Asn1179Thr) and a CFI VUS (p.Ile306Val) and was included in the group of patients with C3 variants.

\* The allele frequency of the variant p.Gly1224Asp in African population is 1.8%.

Rare variants in C3 genes were positioned on molecular structure of C3b (**Figure S1**).

**Supplemental Table 4:** Exhaustive genetic, immunological and histological characteristics of the 66 C3 glomerulopathy /Ig-MPGN patients carrying complement rare variants

| Histological classification | Gene | Fam/Spo | Age at diagnosis | Genetic variant     | Zygoty | C3 (mg/L) | C4 (mg/L) | sC5b-9 (ng/ml) | FH (% of normal value) | FI (% of normal value) | C3NeF | Anti Factor H Ab | Variant Classification |
|-----------------------------|------|---------|------------------|---------------------|--------|-----------|-----------|----------------|------------------------|------------------------|-------|------------------|------------------------|
| C3 glomerulopathy           | CFH  | Fam 1*1 | NA               | p.Gly94Arg          | Het    | 436       | 209       | 465            | 78                     | 130                    | N     | N                | Pathogenic             |
| C3 glomerulopathy           | CFH  | Fam 1*2 | 39               | p.Gly94Arg          | Het    | 439       | 431       | 490            | 66                     | 70                     | N     | N                | Pathogenic             |
| C3 glomerulopathy           | CFH  | Fam 2*1 | 54               | p.Cys431Ser         | Het    | 740       | 274       | 328            | 77                     | 130                    | N     | N                | Pathogenic             |
| C3 glomerulopathy           | CFH  | Fam 2*2 | 49               | p.Cys431Ser         | Het    | 1020      | 247       | 793            | 87                     | 120                    | N     | N                | Pathogenic             |
| C3 glomerulopathy           | CFH  | Fam 2*3 | 3                | p.Cys431Ser         | Hom    | 97        | 473       | 2976           | <10                    | 100                    | N     | N                | Pathogenic             |
| Ig MPGN                     | CFH  | Fam 3*1 | 15               | p.Phe717Leu         | Het    | 868       | 101       | NA             | 115                    | 107                    | N     | N                | VUS                    |
| Ig MPGN                     | CFH  | Fam 3*2 | 20               | p.Phe717Leu         | Het    | 923       | 130       | NA             | 128                    | 111                    | N     | N                | VUS                    |
| C3 glomerulopathy           | CFH  | Fam 4*1 | 52               | p.Arg53Cys          | Het    | 646       | 249       | 772            | 115                    | 124                    | N     | N                | Pathogenic             |
| Ig MPGN                     | CFH  | Fam 4*2 | 1                | p.Arg53Cys          | Hom    | 144       | 234       | NA             | 126                    | 109                    | N     | N                | Pathogenic             |
| C3 glomerulopathy           | C3   | Fam 5*1 | 42               | p.Ile756Thr         | Het    | 552       | 321       | 677            | 146                    | 123                    | N     | N                | Pathogenic             |
| C3 glomerulopathy           | C3   | Fam 5*2 | 45               | p.Ile756Thr         | Het    | 989       | 366       | NA             | 161                    | 146                    | N     | N                | Pathogenic             |
| C3 glomerulopathy           | C3   | Fam 6*1 | 36               | p.Pro1114Leu        | Het    | 489       | 211       | 162            | 117                    | 103                    | N     | N                | Pathogenic             |
| Ig MPGN                     | C3   | Fam 6*2 | 3                | p.Pro1114Leu        | Het    | 448       | 94        | 151            | 116                    | 106                    | N     | N                | Pathogenic             |
| C3 glomerulopathy           | CFH  | Spo     | 1                | p.Cys673Arg         | Het    | 523       | 141       | 243            | 51                     | 103                    | P     | N                | Pathogenic             |
| C3 glomerulopathy           | C3   | Spo     | 6                | p.Gln216Pro         | Het    | 51        | 147       | 352            | 80                     | 112                    | P     | N                | VUS                    |
| C3 glomerulopathy           | CFH  | Spo     | 15               | p.Arg232Stop        | Het    | 538       | 160       | 755            | 23                     | 86                     | P     | N                | Pathogenic             |
| C3 glomerulopathy           | CFH  | Spo     | 29               | p.Arg444Cys         | Het    | 193       | 255       | 512            | 110                    | 110                    | P     | N                | VUS                    |
| C3 glomerulopathy           | CFH  | Spo     | 55               | p.Leu77Stop         | Het    | 616       | 271       | 498            | 51                     | 123                    | N     | N                | Pathogenic             |
| C3 glomerulopathy           | CFH  | Spo     | 57               | p.Cys431Arg         | Het    | 1100      | 394       | 559            | 90*                    | 120                    | N     | N                | Pathogenic             |
| C3 glomerulopathy           | CFH  | Spo     | 59               | p.Val143Ile         | Het    | 494       | 223       | 698            | 53                     | 97                     | N     | N                | Pathogenic             |
| C3 glomerulopathy           | CFH  | Spo     | 4                | p.Ala161Ser         | Het    | 981       | 257       | 444            | 127                    | 145                    | N     | N                | VUS                    |
| C3 glomerulopathy           | CFI  | Spo     | 4                | p.Val282Leu         | Het    | 625       | 376       | 761            | 118                    | 107                    | N     | N                | VUS                    |
| C3 glomerulopathy           | C3   | Spo     | 6                | p.Asn1179Thr        | Het    | 257       | 208       | 967            | 117                    | 134                    | N     | N                | Pathogenic             |
| C3 glomerulopathy           | CFH  | Spo     | 7                | p.Ala161Ser         | Het    | 802       | 345       | NA             | 118                    | 113                    | N     | N                | VUS                    |
| C3 glomerulopathy           | CFH  | Spo     | 10               | p.Cys1043Ser        | Het    | 123       | 69        | NA             | 53                     | 87                     | P     | N                | Pathogenic             |
| C3 glomerulopathy           | CFI  | Spo     | 12               | p.Ile416Leu         | Het    | 664       | 129       | NA             | 81                     | 45                     | N     | N                | Pathogenic             |
| C3 glomerulopathy           | C3   | Spo     | 13               | p.Gly637Arg         | Het    | 850       | 256       | 248            | 63                     | 85                     | N     | N                | VUS                    |
| C3 glomerulopathy           | CFH  | Spo     | 13               | p.Cys536Arg         | Het    | 605       | 312       | NA             | 55                     | 110                    | N     | N                | Pathogenic             |
| C3 glomerulopathy           | C3   | Spo     | 14               | p.Phe794Cys         | Het    | 87        | 307       | 1807           | 180                    | 130                    | P     | N                | VUS                    |
| C3 glomerulopathy           | CFI  | Spo     | 15               | p.Ter584GlnextTer24 | Het    | 933       | 254       | NA             | 87                     | 38                     | N     | N                | Pathogenic             |
| C3 glomerulopathy           | CFH  | Spo     | 16               | p.Tyr843Asp         | Het    | 1670      | 279       | 296            | 112                    | 175                    | N     | N                | VUS                    |
| C3 glomerulopathy           | C3   | Spo     | 19               | p.Gly1224Asp        | Het    | 1050      | 182       | 142            | 81                     | 93                     | N     | N                | VUS                    |
| C3 glomerulopathy           | CFI  | Spo     | 19               | p.Arg474Stop        | Het    | 925       | 128       | 189            | 102                    | 44                     | N     | N                | Pathogenic             |
| C3 glomerulopathy           | C3   | Spo     | 24               | p.Gly637Arg         | Het    | 609       | 182       | 857            | 116                    | 114                    | P     | N                | VUS                    |
| C3 glomerulopathy           | C3   | Spo     | 24               | p.Thr426Iys         | Het    | 569       | 215       | 246            | 138                    | 131                    | N     | N                | VUS                    |
| C3 glomerulopathy           | CFH  | Spo     | 24               | p.Val72Glyfs*3      | Het    | 1310      | 346       | 398            | 123*                   | 131                    | N     | N                | Pathogenic             |
| C3 glomerulopathy           | CFH  | Spo     | 25               | p.Arg1210Cys        | Het    | 794       | 188       | 414            | 103                    | 93                     | P     | N                | Pathogenic             |
| C3 glomerulopathy           | CFI  | Spo     | 27               | p.Asn151Ser         | Het    | 1360      | 438       | 254            | 158                    | 96                     | N     | N                | Pathogenic             |
| C3 glomerulopathy           | CFH  | Spo     | 29               | p.Gly498*           | Het    | 707       | 260       | 244            | 73                     | 111                    | N     | N                | Pathogenic             |
| C3 glomerulopathy           | CFI  | Spo     | 31               | p.Arg406Cys         | Het    | 885       | 204       | 356            | 83                     | 98                     | N     | N                | Pathogenic             |
| C3 glomerulopathy           | CFH  | Spo     | 32               | p.Cys597Arg         | Hom    | 179       | 218       | 3535           | <10                    | 127                    | N     | N                | Pathogenic             |

|                   |     |     |    |                       |     |      |     |      |     |     |   |   |            |
|-------------------|-----|-----|----|-----------------------|-----|------|-----|------|-----|-----|---|---|------------|
| C3 glomerulopathy | CFI | Spo | 32 | p.Ile357Met           | Het | 843  | 308 | NA   | 89  | 61  | N | N | Pathogenic |
| C3 glomerulopathy | CFH | Spo | 36 | p.Ala161Ser           | Het | 544  | 321 | NA   | 121 | 120 | N | N | VUS        |
| C3 glomerulopathy | CFH | Spo | 37 | p.Val686Met           | Het | 183  | 293 | NA   | 12  | 116 | N | N | Pathogenic |
| C3 glomerulopathy | CFI | Spo | 37 | p.Ile357Met           | Het | 990  | 262 | NA   | 109 | 64  | N | N | Pathogenic |
| C3 glomerulopathy | CFI | Spo | 38 | p.Pro50Ala            | Het | 1090 | 401 | 309  | 145 | 45  | N | N | Pathogenic |
| C3 glomerulopathy | CFH | Spo | 40 | p.Gly962ValfsTer13    | Het | 663  | 148 | NA   | 54  | 107 | N | N | Pathogenic |
| C3 glomerulopathy | CFH | Spo | 42 | p.Asp130Asn           | Het | 878  | 218 | 321  | 143 | 147 | N | N | VUS        |
| C3 glomerulopathy | CFH | Spo | 43 | p.ter 1232 IlefsTer38 | Het | 780  | 383 | 282  | 49  | 108 | N | N | Pathogenic |
| C3 glomerulopathy | CFH | Spo | 44 | p.Gly122_Glu128del fs | Het | 883  | 254 | 471  | 88* | 122 | N | N | Pathogenic |
| C3 glomerulopathy | C3  | Spo | 48 | p.Gly590Ala           | Het | 578  | 236 | 302  | 82  | 98  | N | N | VUS        |
| C3 glomerulopathy | CFI | Spo | 48 | p.Pro50Ala            | Het | 1190 | 226 | NA   | 147 | 140 | N | N | Pathogenic |
| C3 glomerulopathy | CFH | Spo | 55 | p.Gly879Arg           | Het | 470  | 332 | 964  | 45  | 95  | N | N | Pathogenic |
| C3 glomerulopathy | CFI | Spo | 55 | p.Asn151Ser           | Het | 973  | 255 | 250  | 101 | 48  | N | N | Pathogenic |
| C3 glomerulopathy | CFH | Spo | 62 | IVS 15+5              | Het | 689  | 259 | 360  | 60  | 107 | N | N | Pathogenic |
| C3 glomerulopathy | CFH | Spo | 65 | p.Trp436Stop          | Het | 884  | 313 | NA   | 66  | 121 | N | N | Pathogenic |
| C3 glomerulopathy | CFH | Spo | 67 | p.Cys141Arg           | Het | 844  | 127 | 1266 | 60  | 127 | N | N | Pathogenic |
| C3 glomerulopathy | CFI | Spo | 69 | p.Ala240Gly           | Het | 975  | 193 | 705  | 176 | 107 | N | N | Pathogenic |
| C3 glomerulopathy | CFH | Spo | 95 | p.Gln872Stop          | Het | 565  | 253 | 367  | 57  | 107 | N | N | Pathogenic |
| Ig MPGN           | CFH | Spo | 7  | p.Arg303Trp           | Het | 989  | 227 | NA   | 146 | 102 | N | N | VUS        |
| Ig MPGN           | CFI | Spo | 17 | p.Ile416Leu           | Het | 736  | 252 | NA   | 100 | 70  | N | N | Pathogenic |
| Ig MPGN           | CFH | Spo | 18 | p.Cys673Ser           | Hom | 46   | 181 | 1900 | <10 | 75  | N | N | Pathogenic |
| Ig MPGN           | CFH | Spo | 21 | p.Asp130Asn           | Het | 1240 | 328 | 437  | 130 | 91  | N | N | VUS        |
| Ig MPGN           | CFI | Spo | 31 | p.Gly119Arg           | Het | 103  | 66  | NA   | 101 | 58  | P | N | Pathogenic |
| Ig MPGN           | CFI | Spo | 32 | p.Ile357Met           | Het | 574  | 306 | NA   | 111 | 19  | N | N | Pathogenic |
| Ig MPGN           | CFI | Spo | 59 | p.Cys327Arg           | Het | 568  | 155 | NA   | 104 | 45  | N | N | Pathogenic |

Abbreviations: C3NeF: C3 Nephritic Factor; Het: heterozygote; Hom: homozygote; Ig-MPGN: immunoglobulin mediated membranoproliferative glomerulonephritis; N: negative; NA: not available; P: positive; Spo: sporadic. VUS: variants of undetermined significance

\* Instead of normal FH plasma level for these three CFH variants genetic abnormality allow us to anticipate FH quantitative deficiency (deletion or loss of conserved Cysteine)

**Supplemental Table 5:** Characteristics of inherited C3 glomerulopathy/Ig-MPGN according to age diagnosis

|                                            | Children**<br>N=20 | Adults<br><50yr<br>N=32 | Adults<br>>50yr<br>N=13 | P value |
|--------------------------------------------|--------------------|-------------------------|-------------------------|---------|
| <b>Clinical data at diagnosis</b>          |                    |                         |                         |         |
| Male sex                                   | 12/20 (60)         | 16/32 (50)              | 8/13 (62)               | 0.69    |
| Age                                        | 9 (4-15)           | 32 (24-42)              | 59 (55-66)              | <0.0001 |
| eGFR (ml/min/1,73m <sup>2</sup> )          | 85 (40-100)        | 47 (14-80)              | 42 (29-57)              | 0.03    |
| Nephrotic Syndrome                         | 11/19 (58)         | 13/26 (50)              | 1/13 (8)                | 0.01    |
| Biological stigmata of TMA                 | 0/20               | 5/30 (17)               | 1/13 (8)                | 0.14    |
| Infectious trigger                         | 11/15 (73)         | 4/25 (16)               | 0/9                     | <0.0001 |
| Low C3 level (<660 mg/L)                   | 11/20 (55)         | 13/32 (41)              | 6/13 (46)               | 0.60    |
| High sC5b-9 (>300 ng/ml)                   | 7/11 (64)          | 15/22 (68)              | 10/11 (91)              | 0.28    |
| C3NeF                                      | 5/20 (30)          | 2/29 (9)                | 0/13                    | 0.03    |
| <i>Histological data at diagnosis</i>      |                    |                         |                         |         |
| C3 glomerulopathy                          | 15/20 (75)         | 27/32 (84)              | 12/13 (92)              | 0.41    |
| Ig-MPGN                                    | 5/20 (25)          | 5/32 (16)               | 1/13 (8)                | 0.41    |
| <i>Complement rare variant identified</i>  |                    |                         |                         |         |
| CFH variant                                | 11/20 (55)         | 16/32 (50)              | 10/13 (77)              | 0.25    |
| CFI variant                                | 4/20 (20)          | 9/32 (28)               | 3/13 (23)               | 0.80    |
| C3 variant                                 | 5/20 (25)          | 7/32 (22)               | 0/13                    | 0.15    |
| Variant classified as pathogenic           | 11/20 (55)         | 23/32 (72)              | 13/13<br>(100)          | 0.02    |
| <b>Kidney outcome</b>                      |                    |                         |                         |         |
| Kidney failure                             | 11/20 (55)         | 23/32 (72)              | 8/13 (62)               | 0.45    |
| Duration of evolution until kidney failure | 111 (67-195)       | 28 (2-84)               | 29 (19-92)              | 0.02    |

Qualitative variables are described as frequencies (percentages), quantitative variables as median (interquartile range). Time is expressed in months.

Abbreviations: C3NeF: C3 Nephritic Factor, CFH: complement factor H, CFI: complement factor I, eGFR: estimated glomerular filtration rate, TMA: thrombotic micro angiopathy, Ig-MPGN: Immunoglobulin mediated Membranoproliferative Glomerulonephritis, sC5b-9: soluble C5b-9

\*Only 65 patients are included in this analysis: age at diagnosis was unknown in one carrying *CFH* rare variant.

\*\*Were defined as children, patients with disease onset before 18 years old.

**Supplemental Table 6:** Characteristics of C3 glomerulopathy /Ig-MPGN children patients carrying rare variants in *CFH*, *CFI*, *C3* genes or not

|                                                   | No variant<br>N=86 | <i>CFH</i> , <i>CFI</i> or<br><i>C3</i> Variants<br>N=20 | P value |
|---------------------------------------------------|--------------------|----------------------------------------------------------|---------|
| <b>Clinical data at first clinical evaluation</b> |                    |                                                          |         |
| Male sex                                          | 40/86 (47)         | 12/20 (60)                                               | 0.32    |
| Nephrotic Syndrome                                | 39/74 (53)         | 11/19 (58)                                               | 0.80    |
| eGFR (ml/min/1,73m <sup>2</sup> )                 | 100 (43-100)       | 85 (40-100)                                              | 0.74    |
| Low C3 level (<660 mg/L)                          | 50/84 (60)         | 11/20 (55)                                               | 0.80    |
| High sC5b-9 (>300 ng/ml)                          | 54/70 (77)         | 7/11 (64)                                                | 0.45    |
| C3NeF                                             | 61/84 (73)         | 5/20 (30)                                                | 0.0006  |
| <b>Histological data</b>                          |                    |                                                          |         |
| C3 glomerulopathy                                 | 73/86 (85)         | 15/20 (75)                                               | 0.32    |
| Ig-MPGN                                           | 13/86 (15)         | 5/20 (25)                                                | 0.32    |

Qualitative variables are described as frequencies (percentages), quantitative variables as median (interquartile range). Time is expressed in months.

Abbreviations: C3NeF: C3 Nephritic Factor; CFH: complement factor H, CFI: complement factor I, eGFR: estimated glomerular filtration rate, Ig-MPGN: immunoglobulin mediated membranoproliferative glomerulonephritis.

**Supplemental Table 7:** Characteristics of C3 glomerulopathy /Ig-MPGN adults under 50 patients carrying rare variants in *CFH*, *CFI*, *C3* genes or not

|                                                   | No variant<br>N=96 | <i>CFH</i> , <i>CFI</i> or<br><i>C3</i> Variants<br>N=32 | P value |
|---------------------------------------------------|--------------------|----------------------------------------------------------|---------|
| <b>Clinical data at first clinical evaluation</b> |                    |                                                          |         |
| Male sex                                          | 51/96 (53)         | 16/32 (50)                                               | 0.84    |
| Nephrotic Syndrome                                | 43/79 (54)         | 13/26 (50)                                               | 0.82    |
| eGFR (ml/min/1,73m <sup>2</sup> )                 | 80 (38-100)        | 47 (14-80)                                               | 0.008   |
| Low C3 level (<660 mg/L)                          | 42/95 (44)         | 13/32 (41)                                               | 0.83    |
| High sC5b-9 (>300 ng/ml)                          | 50/77 (65)         | 15/22 (68)                                               | 0.99    |
| C3NeF                                             | 31/91 (34)         | 2/29 (9)                                                 | 0.006   |
| <b>Histological data</b>                          |                    |                                                          |         |
| C3 glomerulopathy                                 | 83/96 (87)         | 27/32 (84)                                               | 0.77    |
| Ig-MPGN                                           | 13/96 (13)         | 5/32 (16)                                                | 0.77    |

Qualitative variables are described as frequencies (percentages), quantitative variables as median (interquartile range). Time is expressed in months.

Abbreviations: C3NeF: C3 Nephritic Factor ; CFH: complement factor H, CFI: complement factor I, eGFR: estimated glomerular filtration rate, Ig-MPGN: immunoglobulin mediated membranoproliferative glomerulonephritis.

**Supplemental Table 8:** Characteristics of C3 glomerulopathy /Ig-MPGN adults older than 50 patients carrying rare variants in *CFH*, *CFI*, *C3* genes or not

|                                                   | No variant<br>N=28 | <i>CFH</i> , <i>CFI</i> or<br><i>C3</i> Variants<br>N=13 | P value |
|---------------------------------------------------|--------------------|----------------------------------------------------------|---------|
| <b>Clinical data at first clinical evaluation</b> |                    |                                                          |         |
| Male sex                                          | 20/28 (62)         | 8/13 (62)                                                | 0.72    |
| Nephrotic Syndrome                                | 13/21 (62)         | 1/13 (8)                                                 | 0.003   |
| eGFR (ml/min/1,73m <sup>2</sup> )                 | 38 (27-57)         | 42 (29-57)                                               | 0.79    |
| Low C3 level (<660 mg/L)                          | 10/28 (36)         | 6/13 (46)                                                | 0.73    |
| High sC5b-9 (>300 ng/ml)                          | 19/25 (79)         | 10/11 (91)                                               | 0.64    |
| C3NeF                                             | 7/27 (26)          | 0/13                                                     | 0.07    |
| <b>Histological data</b>                          |                    |                                                          |         |
| C3 glomerulopathy                                 | 23/28 (82)         | 12/13 (92)                                               | 0.64    |
| Ig-MPGN                                           | 5/28 (18)          | 1/13 (8)                                                 | 0.64    |

Qualitative variables are described as frequencies (percentages), quantitative variables as median (interquartile range). Time is expressed in months.

Abbreviations: C3NeF: C3 Nephritic Factor ; CFH: complement factor H, CFI: complement factor I, eGFR: estimated glomerular filtration rate, Ig-MPGN: immunoglobulin mediated membranoproliferative glomerulonephritis.

**Supplemental Table 9:** Detailed histological characteristics in inherited C3 glomerulopathy/Ig-MPGN \*

|                                                                | Available data | All        | CFH Variants N=38 | CFI Variants N=16 | C3 Variants N=12 | P value |
|----------------------------------------------------------------|----------------|------------|-------------------|-------------------|------------------|---------|
| <b>General Histological data</b>                               |                |            |                   |                   |                  |         |
| Time from clinical knowledge of the disease to biopsy (months) | 66             | 1 (0-12)   | 0 (0-11)          | 1 (0-39)          | 1 (0-7)          | 0.96    |
| C3 glomerulopathy                                              | 66             | 55/66 (83) | 32/38 (84)        | 12/16 (75)        | 11/12 (92)       | 0.49    |
| Ig-MPGN                                                        | 66             | 11/66 (17) | 6/38 (16)         | 4/16 (25)         | 1/12 (8)         | 0.49    |
| <b>Glomeruli</b>                                               |                |            |                   |                   |                  |         |
| No of glomeruli                                                | 58             | 15 (10-21) | 15 (10-21)        | 13 (10-19)        | 19 (14-29)       | 0.39    |
| % Sclerotic glomeruli                                          | 58             | 9 (0-26)   | 12 (0-35)         | 0 (0-14)          | 18 (4-58)        | 0.03    |
| Extra-capillary proliferation                                  | 64             | 15/64 (23) | 9/37 (24)         | 4/16 (25)         | 2/11 (18)        | 0.90    |
| Fibro crescents                                                | 64             | 5/64 (8)   | 2/37 (5)          | 1/16 (6)          | 2/11 (18)        | 0.37    |
| MPGN pattern                                                   | 64             | 36/64 (56) | 22/37 (60)        | 8/16 (50)         | 6/11 (55)        | 0.81    |
| Endocapillary proliferation                                    | 64             | 37/64 (58) | 21/37 (57)        | 10/16 (63)        | 6/11 (55)        | 0.90    |
| Mesangial hypertrophy and/or hypercellularity                  | 64             | 52/64 (81) | 35/37 (97)        | 10/16 (63)        | 7/11 (64)        | 0.006   |
| LM Deposits                                                    | 64             | 29/64 (45) | 18/37 (47)        | 4/16 (25)         | 7/11 (64)        | 0.12    |
| <b>Interstitial</b>                                            |                |            |                   |                   |                  |         |
| Interstitial fibrosis / tubular atrophy                        | 64             | 45/64 (70) | 27/37 (73)        | 11/16 (69))       | 7/11 (64)        | 0.83    |
| Interstitial inflammation                                      | 64             | 36/64 (56) | 20/17 (54)        | 11/16 (69)        | 5/11 (45)        | 0.45    |
| <b>Vessels</b>                                                 |                |            |                   |                   |                  |         |
| TMA lesions**                                                  | 64             | 6/64 (9)   | 3/37 (8)          | 3/16 (19)         | 0/11 (0)         | 0.24    |
| Arteriosclerosis and/or arteriolar hyalinosis                  | 64             | 33/64 (52) | 20/37 (54)        | 8/16 (50)         | 5/11 (45)        | 0.87    |

Data are expressed as mean (IDR) or n(%).

\* C3 glomerulopathy or Ig-MPGN diagnosis was made on native kidney in 59 patients (n=36 in *CFH* variants, n=11 in *CFI* variants and n= 12 in *C3* variants) and on kidney graft after kidney failure of undetermined cause in 7 patients (n=2 *CFH* variants and n= 5 *CFI* variants).

Abbreviations: Ig-MPGN: Immunoglobulin mediated Membranoproliferative Glomerulonephritis, LM: Light Microscopy; MPGN: Membranoproliferative Glomerulonephritis, TMA: thrombotic micro angiopathy.

\*\*TMA lesions consisted in: Fibrin thrombus, Double contour formation, Organizing arteriolar thrombosis, Arteriolar occlusion, Onion skin lesion



**Supplemental Table 10:** Characteristics of patients with inherited C3 glomerulopathy/Ig-MPGN according to histological diagnosis

|                                                   | C3 glomerulopathy<br>N=55 | Ig-MPGN<br>N=11 | P value |
|---------------------------------------------------|---------------------------|-----------------|---------|
| <b>Clinical data at first clinical evaluation</b> |                           |                 |         |
| Male sex                                          | 31/55 (56)                | 6/11 (55)       | 0.99    |
| Age                                               | 34 (15-48)                | 18 (7-31)       | 0.05    |
| Children                                          | 15/54 (28)                | 5/11 (46)       | 0.28    |
| Proteinuria g/day                                 | 3 (1.1-4.1)               | 2.4(1.7-5.0)    | 0.58    |
| Nephrotic Syndrome                                | 26/50 (52)                | 4/9 (44)        | 0.73    |
| eGFR (ml/min/1.73m <sup>2</sup> )                 | 44 (23-80)                | 80 (60-100)     | 0.048   |
| eGFR>60ml/min/1.73m <sup>2</sup>                  | 18/51 (35)                | 9/11 (82)       | 0.007   |
| eGFR 15 - 60ml/min/1.73m <sup>2</sup>             | 24/51 (47)                | 2/11 (18)       | 0.10    |
| eGFR ≤15ml/min/1.73m <sup>2</sup>                 | 9/51 (18)                 | 0               | 0.34    |
| Low C3 level (<660 mg/L)                          | 25/55 (45)                | 6/11 (55)       | 0.74    |
| High sC5b-9 (>300 ng/ml)                          | 31/42 (74)                | 2/3 (67)        | 0.99    |
| C3NeF                                             | 8/55 (15)                 | 1/11 (9)        | 0.99    |
| <b>Histological findings</b>                      |                           |                 |         |
| No of glomeruli                                   | 15 (10-21)                | 16 (9-19)       | 0.67    |
| % Sclerotic glomeruli                             | 10 (0-29)                 | 3 (0-26)        | 0.30    |
| Extracapillary proliferation                      | 11/53 (21)                | 4/11 (36)       | 0.27    |
| Fibro crescents                                   | 4/53 (8)                  | 1/11 (9)        | 0.99    |
| MPGN pattern                                      | 26/53 (49)                | 10/11 (91)      | 0.02    |
| Endocapillar proliferation                        | 28/53 (53)                | 9/11 (82)       | 0.10    |
| Mesangial hypertrophy and/or hypercellularity     | 43/53 (81)                | 9/11 (82)       | 0.99    |
| LM Deposits                                       | 22/53 (42)                | 7/11 (64)       | 0.20    |
| Interstitial fibrosis / tubular atrophy           | 38/53 (72)                | 7/11 (64)       | 0.72    |
| Interstitial inflammation                         | 30/53 (57)                | 5/11 (55)       | 0.99    |
| TMA lesions**                                     | 5/53 (9)                  | 1/11 (9)        | 0.99    |
| Arteriosclerosis and/or arteriolar hyalinosis     | 29/53 (55)                | 4/11 (36)       | 0.33    |
| <b>Treatment</b>                                  |                           |                 |         |
| No specific treatment                             | 30/51 (59)                | 3/11 (27)       | 0.09    |
| <i>Plasma Exchange</i>                            | 3/51 (6)                  | 0               | 0.99    |
| <i>Immunosuppressive treatment</i>                | 18/51 (35)                | 8/11 (73)       | 0.04    |
| Corticosteroid alone                              | 9/51 (18)                 | 7/11 (64)       | 0.004   |
| Corticosteroid associated with other IS agent     | 9/51 (18)                 | 1/11 (9)        | 0.67    |
| <b>Follow-up on native kidney</b>                 |                           |                 |         |
| Follow-up                                         | 84 (59-148)               | 197 (105-268)   | 0.009   |
| Kidney function at last follow up                 |                           |                 |         |
| eGFR>60ml/min/1.73m <sup>2</sup>                  | 16/55 (29)                | 2/11 (18)       | 0.71    |
| eGFR<60ml/min/1.73m <sup>2</sup>                  | 4/55 (7)                  | 1/11 (9)        | 0.99    |
| Kidney failure (dialysis or transplantation)      | 35/55 (64)                | 8/11 (73)       | 0.73    |

Qualitative variables are described as frequencies (percentages), quantitative variables as median (interquartile range). Time is expressed in months.

Abbreviations: C3NeF: C3 Nephritic Factor ; CFH: complement factor H, CFI: complement factor I, eGFR: estimated glomerular filtration rate, Ig-MPGN: immunoglobulin mediated membranoproliferative glomerulonephritis.

\*\*TMA lesions consisted in: Fibrin thrombus, Double contour formation, Organizing arteriolar thrombosis, Arteriolar occlusion, Onion skin lesion

**Supplemental Table 11:** Detailed Immunological characteristics of inherited C3 glomerulopathy/Ig-MPGN

|                                          | <b>CFH Variants<br/>N=38</b> | <b>CFI<br/>Variants<br/>N=16</b> | <b>C3 Variants<br/>N=12</b> | <b>P value</b> |
|------------------------------------------|------------------------------|----------------------------------|-----------------------------|----------------|
| Familial form/pedigree                   | 4/33 (12)                    | 0/16 (0)                         | 2/10 (20)                   | 0.22           |
| <b>Complement activation biomarkers</b>  |                              |                                  |                             |                |
| C3 level <sup>a</sup> (mg/L)             | 676 (662-883)                | 905 (635-986)                    | 561 (305-561)               | 0.04           |
| Low C3 level                             | 18/38 (47)                   | 4/16 (25)                        | 9/12 (75)                   | 0.03           |
| C4 level <sup>b</sup> (mg/L)             | 255 (204-315)                | 253 (165-308)                    | 213 (182-294)               | 0.52           |
| Low C4 level                             | 1/38 (3)                     | 1/16 (6)                         | 0/12                        | 0.62           |
| Soluble C5b-9 <sup>c</sup> (ng/ml)       | 471(360-772)                 | 309 (250-705)                    | 302 (162-857)               | 0.12           |
| High sC5b-9                              | 23/27 (85)                   | 4/7 (57)                         | 6/11 (55)                   | 0.09           |
| <b>Regulatory proteins</b>               |                              |                                  |                             |                |
| Factor H level (% of normal value)       | 75 (53-116)                  | 103 (92-138)                     | 117 (81-144)                | 0.005          |
| Low Factor H <sup>d</sup>                | 18/38 (47)                   | 0/16                             | 1/12 (8)                    | <0.001         |
| Factor I level (% of normal value)       | 111 (102-123)                | 60 (45-98)                       | 131(113-146)                | <0.001         |
| Low Factor I <sup>d</sup>                | 1/38 (3)                     | 11/16 (69)                       | 0/12                        | <0.001         |
| <b>Associated acquired abnormalities</b> |                              |                                  |                             |                |
| Positive C3NeF                           | 4/38 (11)                    | 2/16 (13)                        | 3/12 (25)                   | 0.15           |
| <b>Genetic summary</b>                   |                              |                                  |                             |                |
| Variant classified as pathogenic         | 28/38 (74)                   | 15/16 (94)                       | 5/12 (42)                   | 0.009          |

Qualitative variables are described as frequencies (percentages), quantitative variables as median (interquartile range). p value was calculated by comparing the 3 different groups *CFH*, *CFI* and *C3* variants

Abbreviations: C3Nef: C3 nephritic factor, *CFH*: complement factor H, *CFI*: complement factor I, sC5b-9: soluble C5b-9

<sup>a</sup>Normal values for C3 plasmatic level: 660-1250 mg/L; <sup>b</sup>Normal values for C4 plasmatic level: 93-380 mg/L; <sup>c</sup>Normal values for C4 plasmatic level: <300 ng/ml; <sup>d</sup> FH and FI measurement are categorized low when <70% of normal value

**Supplemental Table 12:** Cumulative frequency of the rare and pathogenic variants between C3 glomerulopathy / Ig-MPGN cohorts and 503 controls from the 1000 genome project

|                                                            | Total<br>N= 398 | C3<br>glomerulopathy<br>N=296 | Ig-MPGN<br>N=102 | 1000 g<br>N=503 | p<br>(C3 glomerulopathy<br>vs 1000g) | p<br>(Ig-MPGN vs 1000 g) | p<br>(C3<br>glomerulopathy<br>vs<br>Ig-MPGN) | p<br>(C3 glomerulopathy +Ig-<br>MPGN vs 1000g) |
|------------------------------------------------------------|-----------------|-------------------------------|------------------|-----------------|--------------------------------------|--------------------------|----------------------------------------------|------------------------------------------------|
| Rare variant ( <i>CFH</i> , <i>CFI</i> , <i>C3</i> )       | 66 (17)         | 55 (19)                       | 11 (11)          | 24 (5)          | <0.001                               | 0.03                     | 0.09                                         | <0.001                                         |
| Pathogenic variant ( <i>CFH</i> , <i>CFI</i> , <i>C3</i> ) | 48 (12)         | 41 (14)                       | 7 (7)            | 3 (1)           | <0.001                               | <0.001                   | 0.08                                         | <0.001                                         |
| <i>CFH</i> rare variant                                    | 38 (10)         | 32 (11)                       | 6 (6)            | 7 (0.6)         | <0.001                               | 0.01                     | 0.17                                         | <0.001                                         |
| <i>CFH</i> Pathogenic variant                              | 28 (7)          | 26 (9)                        | 2 (2)            | 1 (0.2)         | <0.001                               | 0.07                     | 0.02                                         | <0.001                                         |
| <i>CFI</i> rare variant                                    | 16 (4)          | 12 (4)                        | 4 (4)            | 8 (2)           | 0.04                                 | 0.12                     | 0.99                                         | 0.03                                           |
| <i>CFI</i> Pathogenic variant                              | 15 (4)          | 11 (4)                        | 4 (4)            | 2 (0.4)         | <0.001                               | 0.008                    | 0.99                                         | <0.001                                         |
| <i>C3</i> rare variant                                     | 12 (3)          | 11 (4)                        | 1 (1)            | 9 (2)           | 0.05                                 | 0.99                     | 0.31                                         | 0.12                                           |
| <i>C3</i> Pathogenic variant                               | 5 (1)           | 4 (1)                         | 1 (1)            | 0               | 0.02                                 | 0.17                     | 0.99                                         | 0.02                                           |

Variables are described as frequencies (percentages).

The cumulative allele frequency of the variants between our cohort and 503 controls from the 1000 genome project (1000g).

**Supplemental Table 13:** Kidney transplant outcomes in patients with inherited C3 glomerulopathy/Ig-MPGN

|                                    | All<br>N= 66 | <i>CFH</i><br>Variants<br>N=38 | <i>CFI</i><br>Variants<br>N=16 | <i>C3</i><br>Variants<br>N=12 | P value |
|------------------------------------|--------------|--------------------------------|--------------------------------|-------------------------------|---------|
| Kidney <b>transplantation</b>      | 36/66 (55)   | 17/38 (45)                     | 10/16 (63)                     | 9/12 (75)                     | 0.14    |
| Graft Follow up (months)           | 51 (26-94)   | 48 (20-91)                     | 48 (24-99)                     | 74 (31-117)                   | 0.59    |
| Prophylactic treatment*            | 9/35 (26)    | 5/16 (31)                      | 2/10 (20)                      | 2/9 (22)                      | 0.78    |
| Documented histological recurrence | 21/31 (69)   | 8/13 (62)                      | 8/9 (89)                       | 5/9 (56)                      | 0.26    |
| Delay for histological recurrence  | 12 (2-42)    | 28 (5-43)                      | 5 (0-39)                       | 11 (3-43)                     | 0.63    |
| Histological recurrence at 1 year  | 11/31 (36)   | 3/13 (23)                      | 5/9 (56)                       | 3/9 (33)                      | 0.29    |
| Histological recurrence at 2 years | 12/31 (39)   | 3/13 (23)                      | 6/9 (67)                       | 3/9 (33)                      | 0.11**  |
| Anti-C5 therapy after recurrence   | 10/22 (46)   | 3/8 (38)                       | 6/9 (67)                       | 1/5 (20)                      | 0.21    |
| Graft failure due to recurrence    | 3/36 (8)     | 2/17 (12)                      | 1/10 (10)                      | 0/9 (0)                       | 0.57    |
| Graft function at last follow up   |              |                                |                                |                               |         |
| eGFR>60ml/min/1.73m <sup>2</sup>   | 13/36 (20)   | 6/17 (35)                      | 3/10 (30)                      | 4/9 (44)                      | 0.80    |
| eGFR<60ml/min/1.73m <sup>2</sup>   | 19/36 (28)   | 7/17 (42)                      | 6/10 (60)                      | 5/9 (56)                      | 0.59    |
| Graft loss                         | 5/36 (6)     | 4/17 (24)                      | 1/10 (10)                      | 0                             | 0.23    |

Data are expressed as mean (IDR) or n(%). p value was calculated by comparing the 3 different groups *CFH*, *CFI* and *C3* variants. Time is expressed in months.

Abbreviations: *CFH*: complement factor H, *CFI*: complement factor I, eGFR: estimated glomerular filtration rate.

\*Prophylactic treatment consisted in: -among patients carrying *CFH* variants: 1 plasma perfusion, 2 plasma exchange and 2 Eculizumab therapy; -among patients carrying *CFI* variants: 1 plasma exchange and 1 Eculizumab therapy; -among patients carrying *C3* variants: 2 Eculizumab therapy.

\*\* : p=0.08 between *CFH* and *CFI* groups

## Supplemental Figures

### **Supplemental Figure 1: C3b molecular structure with the position of rare variants of C3 identified in patients with C3 glomerulopathy/Ig-MPGN.**

Pathogenic rare variants of C3b with known deleterious functional consequences are indicated in red and rare variants with unknown significance in blue.

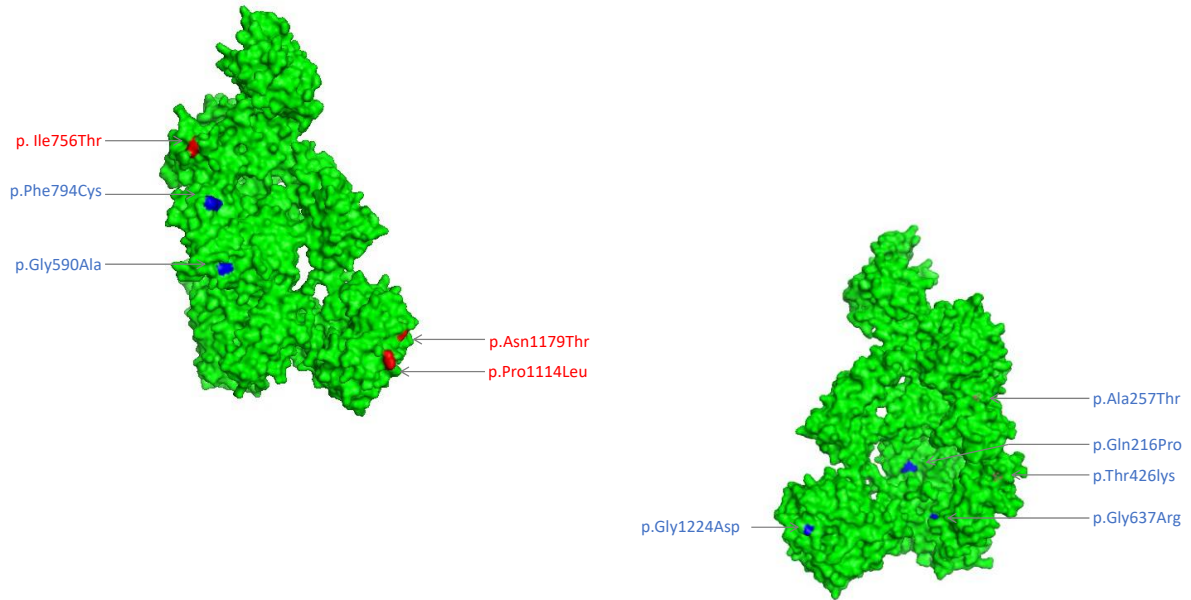

**Supplemental Figure 2: C3 glomerulopathy, Ig-MPGN and CFH, CFI, C3 rare variants: patients repartition in national French registry according to age at diagnosis** *Twenty-three missing values, including 1 in the variant subgroup.*

| C3G/Ig-MPGN complement genetic exploration between 2002 and 2018                   |                                 |                                 |                                 |                                |                                 |
|------------------------------------------------------------------------------------|---------------------------------|---------------------------------|---------------------------------|--------------------------------|---------------------------------|
| Among Children<br>N=137                                                            |                                 | Among Adults < 50 yrs<br>N= 190 |                                 | Among Adults > 50 yrs<br>N=48  |                                 |
| 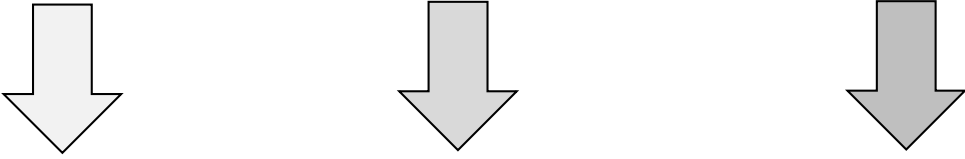 |                                 |                                 |                                 |                                |                                 |
| Rare variant in CFH, CFI or C3 genes                                               |                                 |                                 |                                 |                                |                                 |
| Children<br>N= 20 (14%)                                                            |                                 | Adults < 50 yrs<br>N= 32 (17%)  |                                 | Adults > 50 yrs<br>N= 13 (27%) |                                 |
| <i>C3G</i><br>N=15/104 (14%)                                                       | <i>Ig-MPGN</i><br>N= 5/33 (15%) | <i>C3G</i><br>N= 27/145 (19%)   | <i>Ig-MPGN</i><br>N= 5/45 (11%) | <i>C3G</i><br>N= 12/38 (32%)   | <i>Ig-MPGN</i><br>N= 1/10 (10%) |

### Supplemental Figure 3: Kidney survival of patients with inherited C3 glomerulopathy/Ig-MPGN.

Kaplan Meier kidney survival curve according to the complement component variant, compared to kidney survival of C3 glomerulopathy patients without complement rare variant, A) in children and B) in adults.

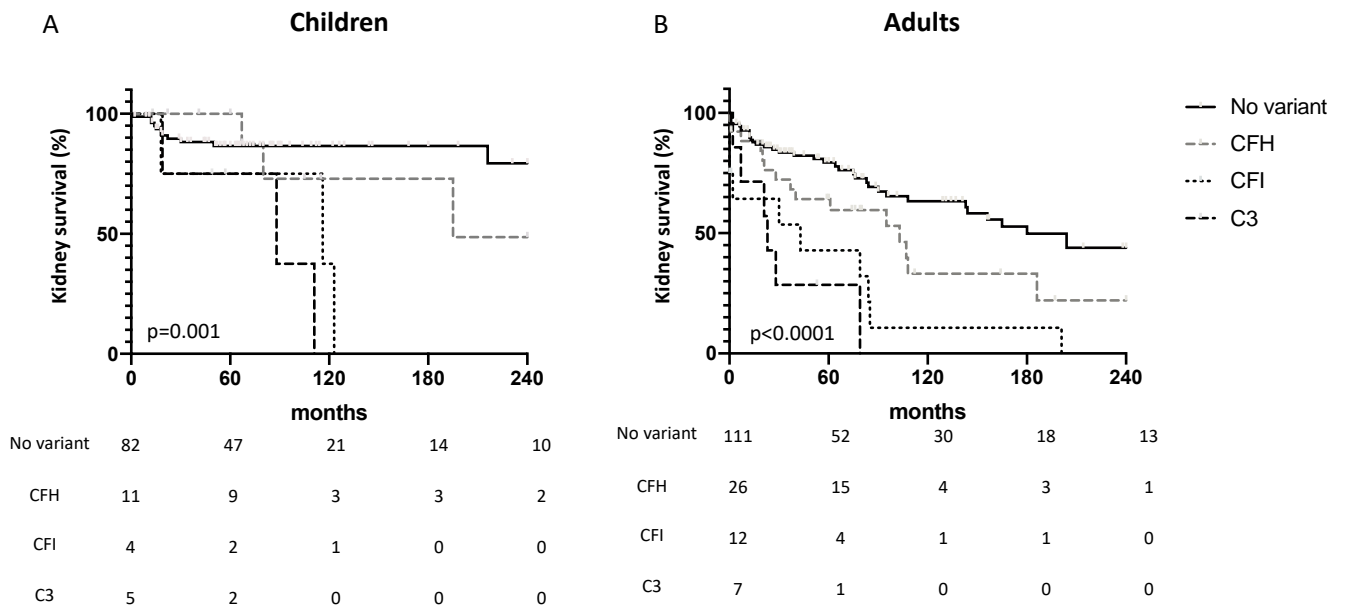



**Supplemental Figure 4: Kidney survival of patients with inherited C3 glomerulopathy/Ig-MPGN compared to kidney survival of patients without complement rare variant receiving or not specific treatment. A) Kaplan Meier kidney survival curve in C3 glomerulopathy/Ig-MPGN patients receiving specific treatment, carrying or not complement rare variant B) Kaplan Meier kidney survival curve in C3 glomerulopathy/Ig-MPGN patients with conservative treatment, carrying or not complement rare variant.**

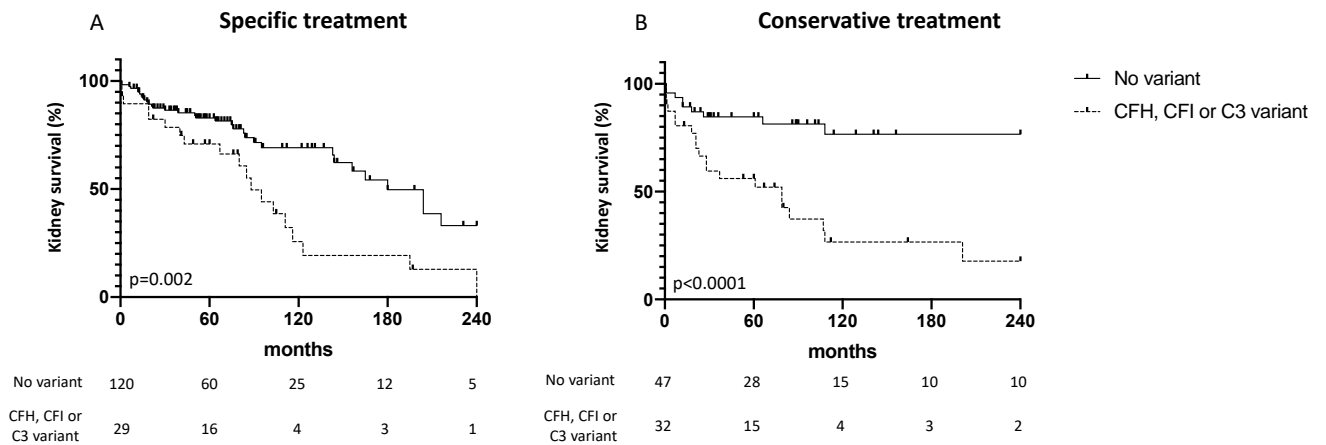

Supplement: cjasn-18-1435-s001.pdf [file cjasn-18-1435-s001.pdf]
